# Supplementary material for: Surrogate Biomarker Prediction from Whole-Slide Images for Evaluating Overall Survival in Lung Adenocarcinoma
Source: MDPI journal article supplement (doi:10.3390/diagnostics14050462), 2024-02-20
Supplement: s1 [file s1]

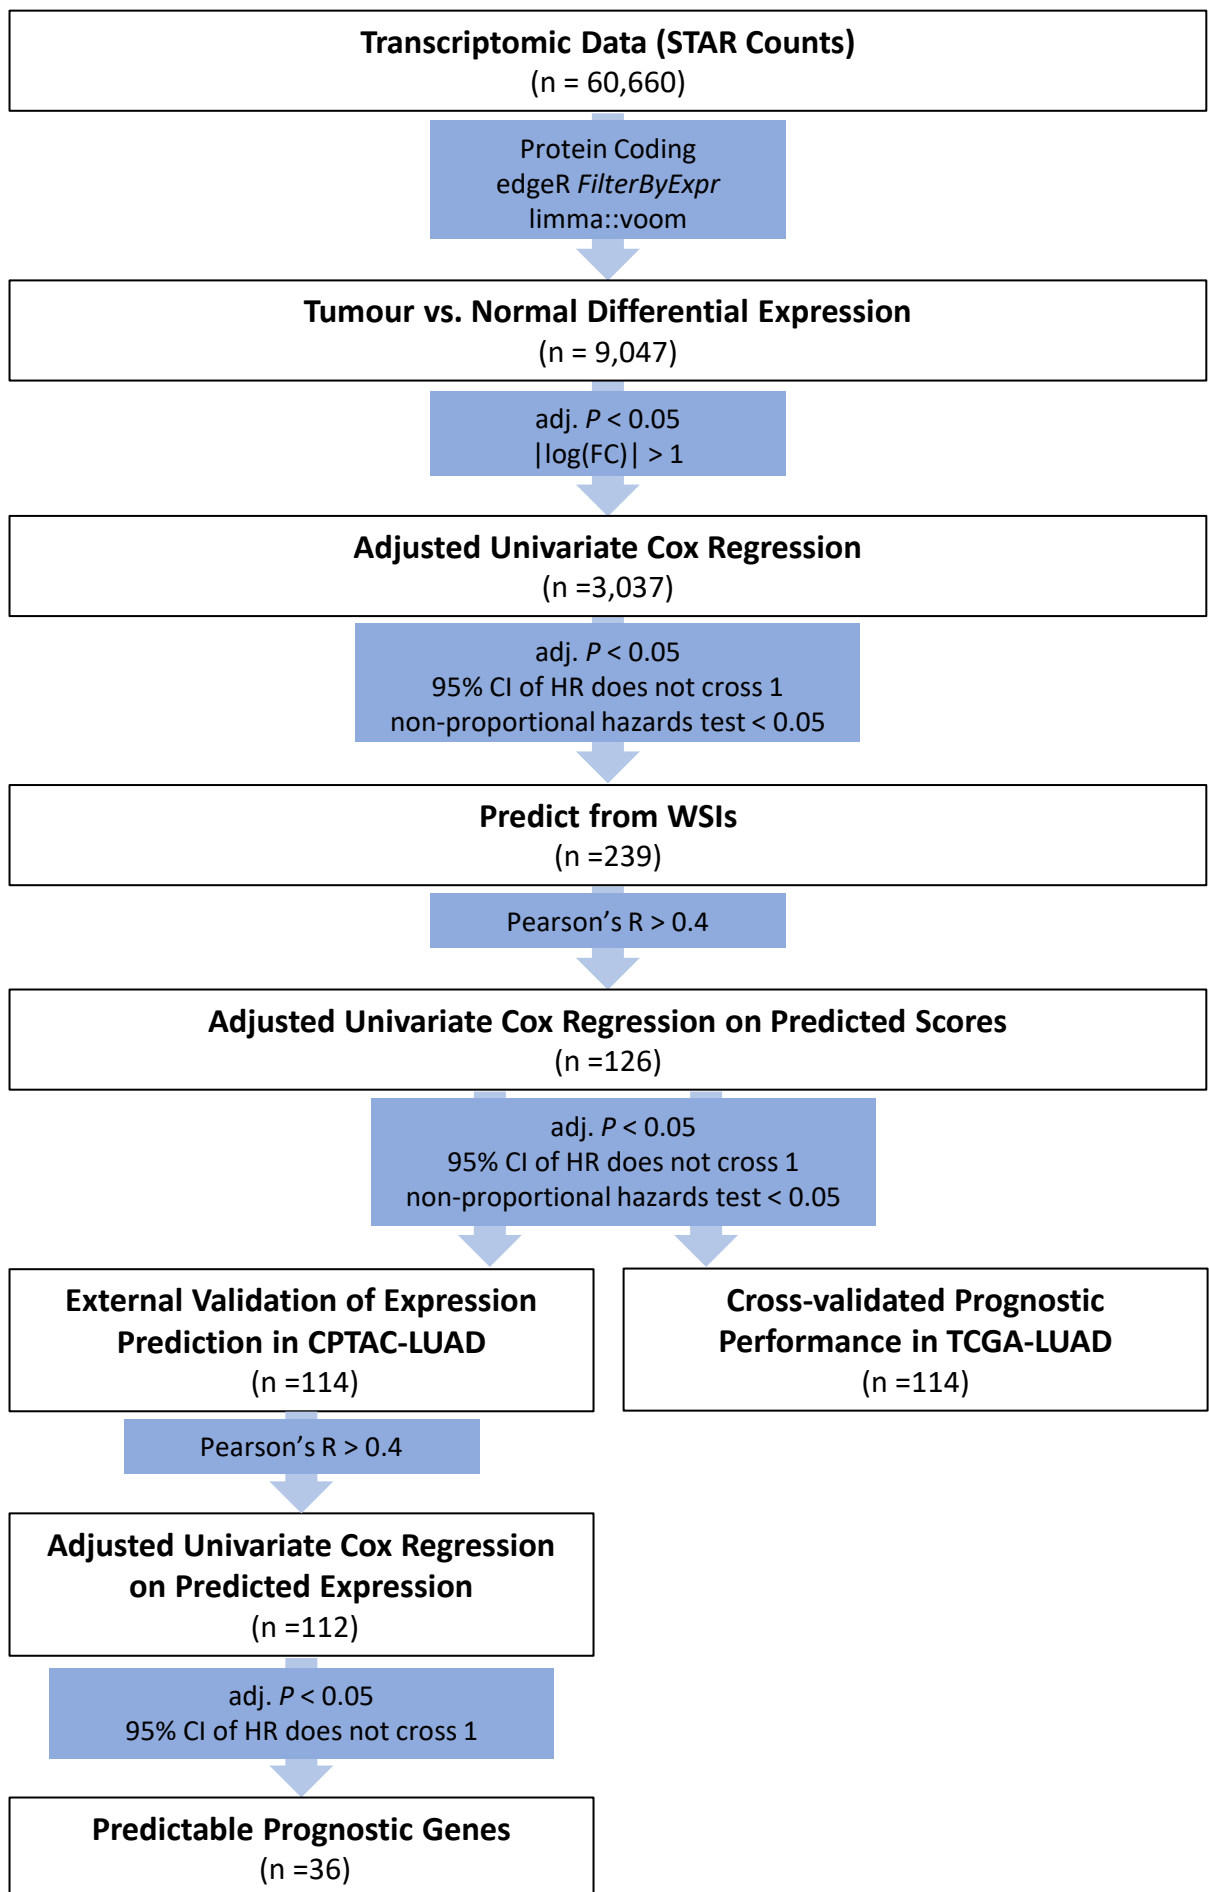

**Suppl. Fig. 1:** Study design flow chart.

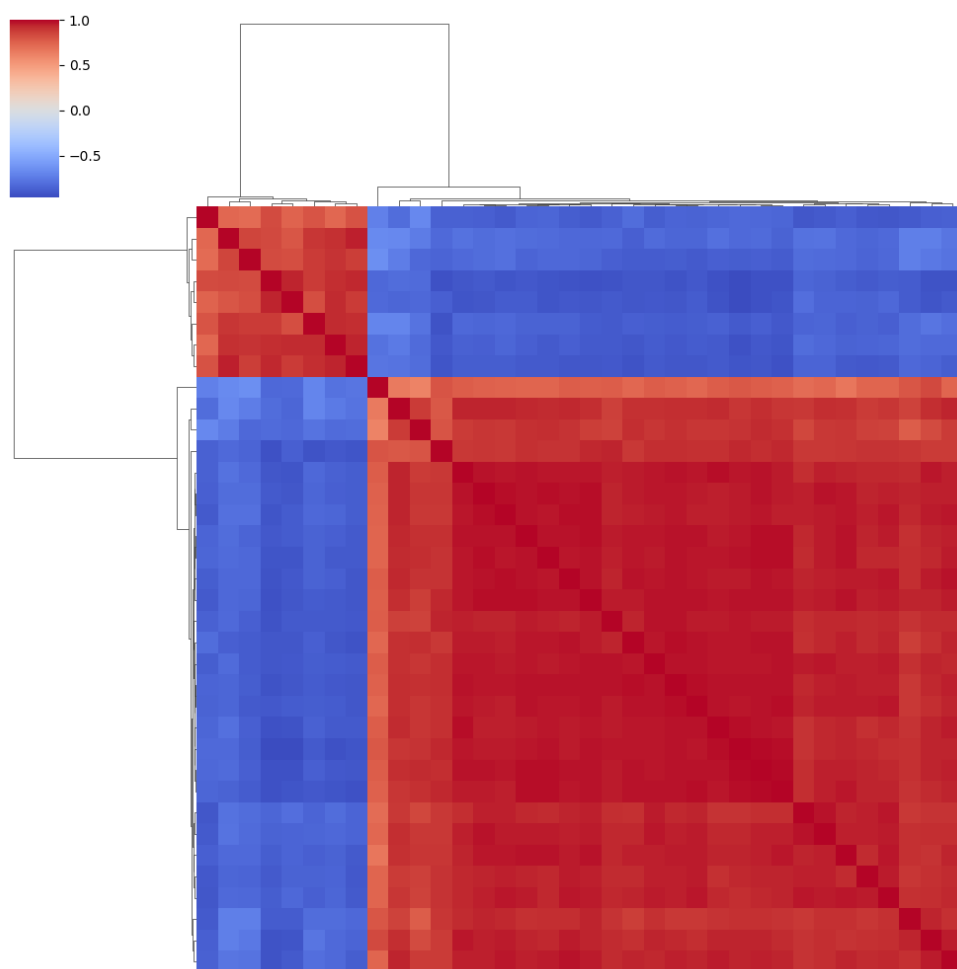

**Suppl. Fig. 2:** Clustergram of the predicted expression of the 36 genes that were found to have predicted expression that was prognostic of OS.

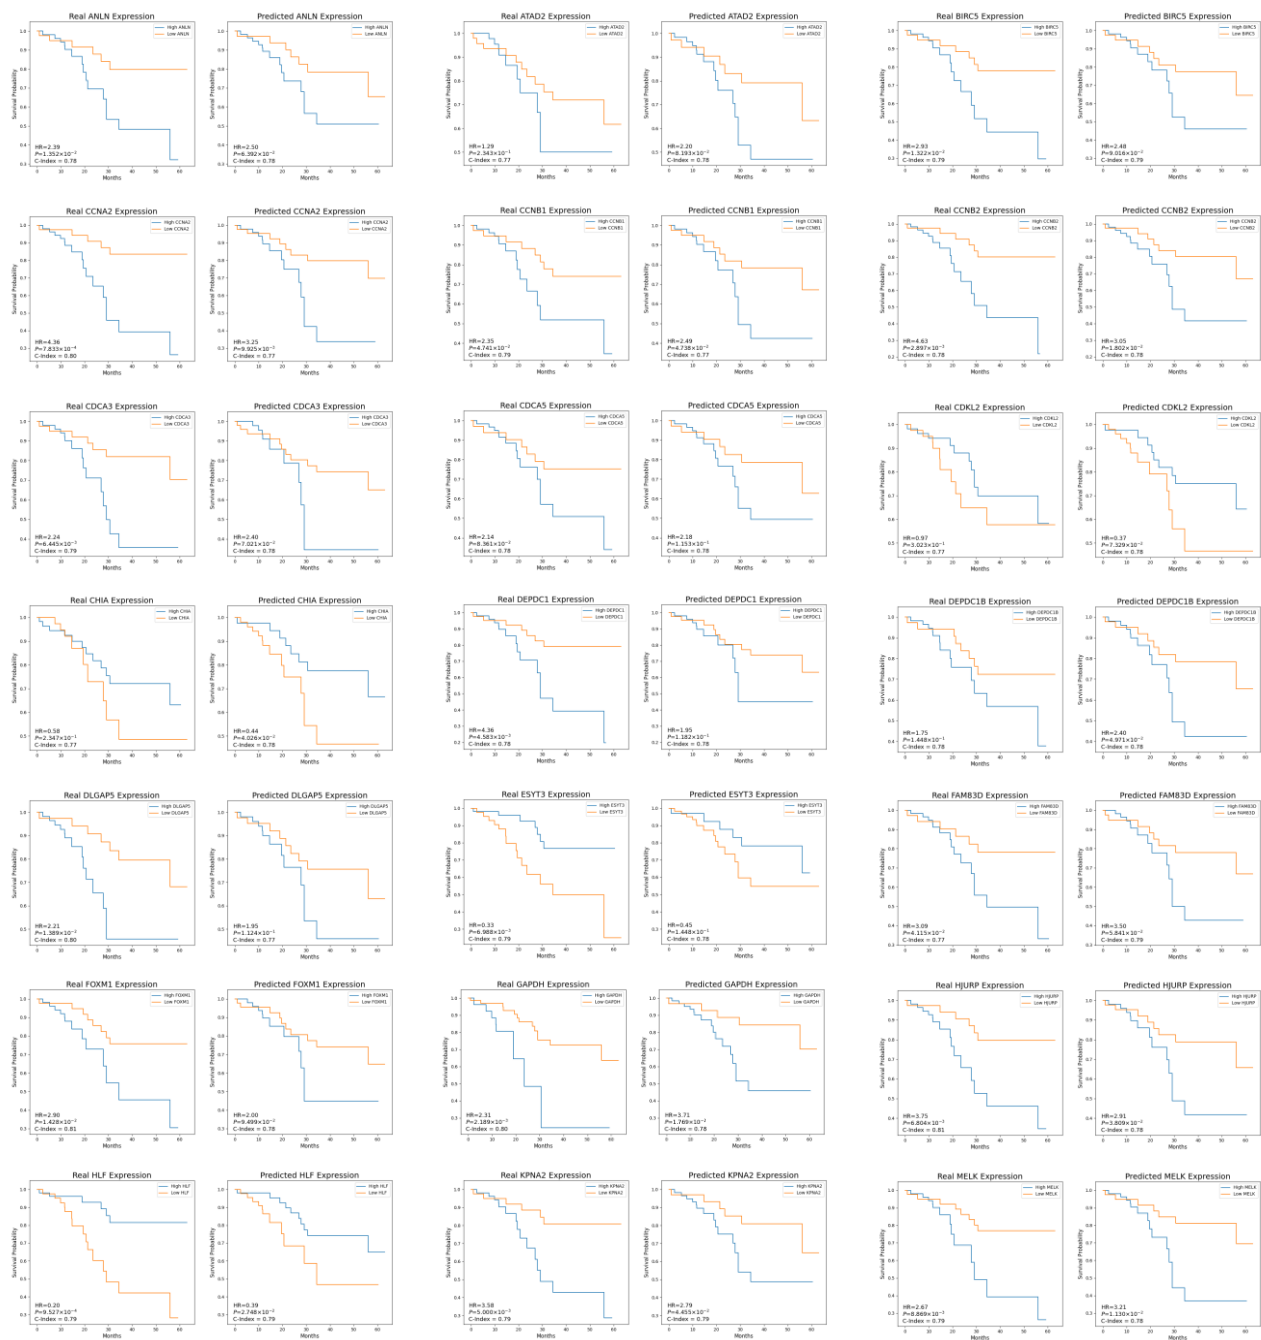

**Suppl. Fig. 3:**

Kaplan-Meier plots of risk groups as determined using KMeans clustering with  $k$  set to 2 for real and predicted gene expression. Plots are shown for each of the 36 genes for which gene expression predicted from WSIs in the CPTAC-LUAD dataset was found to be prognostic of overall survival. Hazard ratios (HR) were determined by setting risk group as a covariate in Cox regression adjusting for age, stage, and sex. Corresponding concordance indices (C-index) are also shown along with log-rank  $P$ -values.

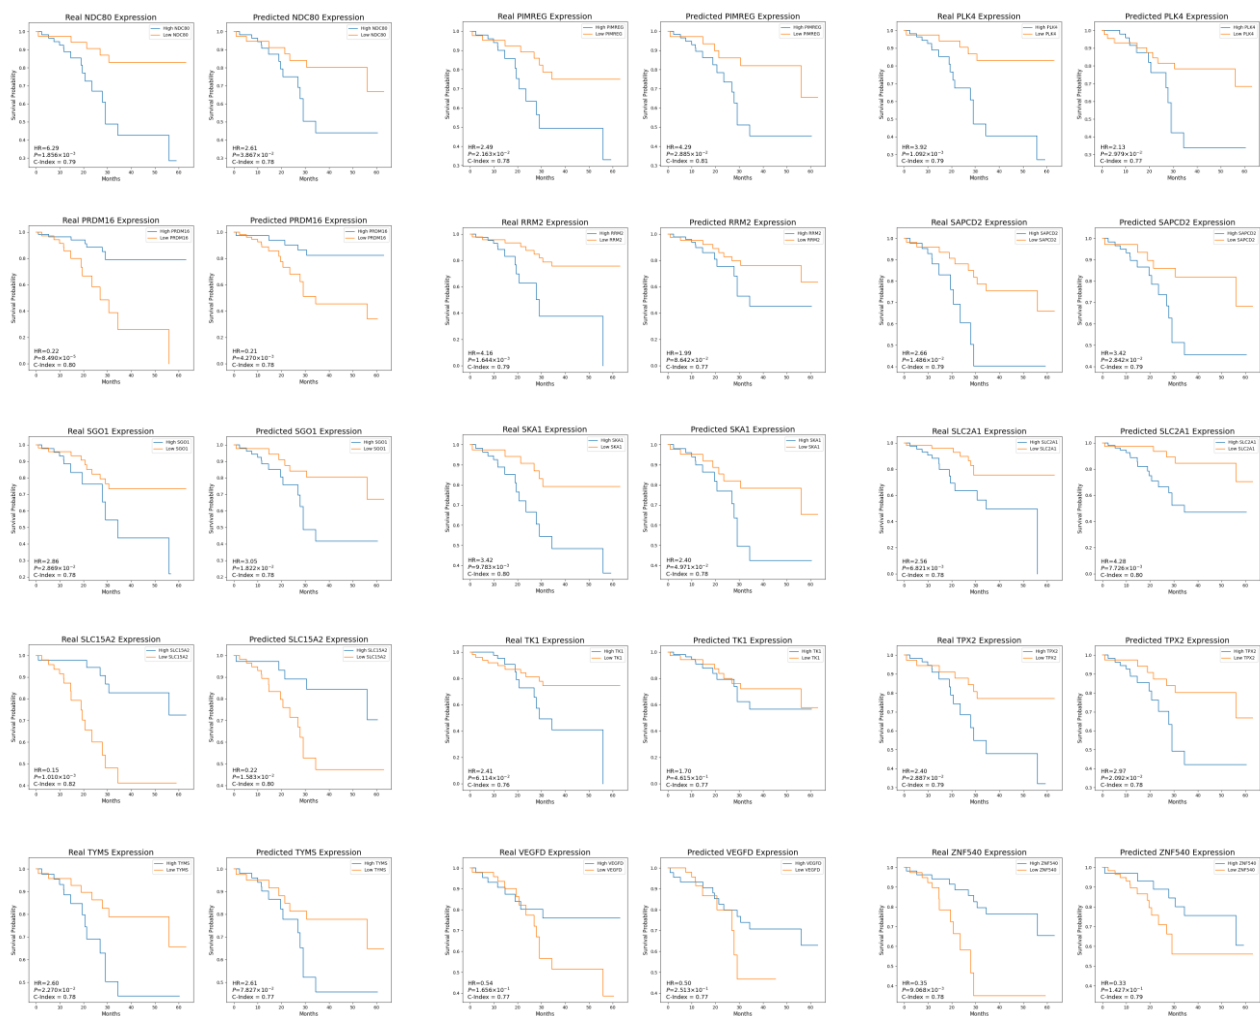

Suppl. Fig. 3 contd.
